# Supplementary material
Source: MDPI journal article supplement (https://www.mdpi.com/1999-4907/11/12/1276)
Supplement: s1 [file s1]

Archive with 3 entries (2 files):
- forests-1002354-supp/
- forests-1002354-supp/forests-1002354-supp-figures.pdf
- forests-1002354-supp/forests-1002354-supp-tables.xlsx
