# Supplementary material
Source: MDPI journal article supplement (https://www.mdpi.com/1999-4907/11/12/1276)
Supplement: s1 [file s1 › forests-1002354-supp/forests-1002354-supp-tables.xlsx]

## Sheet: Table S1
Table S1. The number of living koa trees in each of the four replicates for each of the 25 families included in the wilt resistance field trial. (Note: n = 5 seedlings initially planted in each replicate for each family.)
Family	Source	Rep	n (year 1)	n (year 2)	n (year 3)
PR 2	1	1	5	5	2
PR 2	1	2	3	4	3
PR 2	1	3	4	4	2
PR 2	1	4	0	0	0
	Totals across reps		12	13	7
MRR 14	2	1	4	4	2
MRR 14	2	2	3	3	2
MRR 14	2	3	3	3	2
MRR 14	2	4	4	3	1
	Totals across reps		14	13	7
PH 7	3	1	5	5	3
PH 7	3	2	5	4	1
PH 7	3	3	5	5	2
PH 7	3	4	3	3	2
	Totals across reps		18	17	8
PH 5	4	1	5	5	3
PH 5	4	2	5	3	2
PH 5	4	3	5	3	3
PH 5	4	4	3	1	1
	Totals across reps		18	12	9
MK 3	5	1	5	5	3
MK 3	5	2	5	5	3
MK 3	5	3	4	5	3
MK 3	5	4	1	1	1
	Totals across reps		15	16	10
PH 14	6	1	5	5	2
PH 14	6	2	5	4	2
PH 14	6	3	5	5	3
PH 14	6	4	1	1	1
	Totals across reps		16	15	8
MRR 12	7	1	3	3	2
MRR 12	7	2	4	4	1
MRR 12	7	3	1	1	0
MRR 12	7	4	2	2	2
	Totals across reps		10	10	5
PH 4	8	1	5	5	3
PH 4	8	2	4	3	2
PH 4	8	3	5	5	3
PH 4	8	4	4	4	3
	Totals across reps		18	17	11
PH 10	9	1	5	5	1
PH 10	9	2	3	3	2
PH 10	9	3	4	4	3
PH 10	9	4	5	5	3
	Totals across reps		17	17	9
KM 2C	10	1	4	4	3
KM 2C	10	2	5	5	3
KM 2C	10	3	3	2	2
KM 2C	10	4	4	4	2
	Totals across reps		16	15	10
? No label	11	1	5	5	2
? No label	11	2	4	4	3
? No label	11	3	3	2	1
? No label	11	4	2	2	2
	Totals across reps		14	13	8
PR 9	12	1	4	4	1
PR 9	12	2	5	5	3
PR 9	12	3	2	2	2
PR 9	12	4	4	4	2
	Totals across reps		15	15	8
MK 6	13	1	5	5	3
MK 6	13	2	4	4	4
MK 6	13	3	3	3	2
MK 6	13	4	5	5	3
	Totals across reps		17	17	12
MRR 17	14	1	4	4	3
MRR 17	14	2	5	5	2
MRR 17	14	3	5	5	4
MRR 17	14	4	5	5	2
	Totals across reps		19	19	11
KR 4	15	1	5	5	3
KR 4	15	2	5	5	3
KR 4	15	3	4	3	2
KR 4	15	4	5	4	1
	Totals across reps		19	17	9
MRR 19	16	1	5	5	2
MRR 19	16	2	4	4	2
MRR 19	16	3	4	4	3
MRR 19	16	4	2	2	2
	Totals across reps		15	15	9
Lapa Exclosure	17	1	4	4	1
Lapa Exclosure	17	2	5	5	2
Lapa Exclosure	17	3	5	3	2
Lapa Exclosure	17	4	3	2	1
	Totals across reps		17	14	6
PH 1	18	1	5	5	2
PH 1	18	2	5	5	3
PH 1	18	3	4	2	1
PH 1	18	4	5	5	3
	Totals across reps		19	17	9
PH 2	19	1	4	4	2
PH 2	19	2	5	2	2
PH 2	19	3	4	1	1
PH 2	19	4	4	2	2
	Totals across reps		17	9	7
Kauai Susc. Bulk	20	1	3	3	1
Kauai Susc. Bulk	20	2	1	0	0
Kauai Susc. Bulk	20	3	2	0	0
Kauai Susc. Bulk	20	4	2	2	2
	Totals across reps		8	5	3
KR 5	21	1	5	5	3
KR 5	21	2	5	5	4
KR 5	21	3	4	4	3
KR 5	21	4	4	3	3
	Totals across reps		18	17	13
PH 9	22	1	5	5	2
PH 9	22	2	3	5	2
PH 9	22	3	5	5	3
PH 9	22	4	3	3	2
	Totals across reps		16	18	9
PR 4	23	1	3	3	2
PR 4	23	2	4	4	3
PR 4	23	3	4	4	3
PR 4	23	4	3	3	3
	Totals across reps		14	14	11
PR 8	24	1	4	4	2
PR 8	24	2	4	4	3
PR 8	24	3	3	3	2
PR 8	24	4	4	4	3
	Totals across reps		15	15	10
KC10-10	25	1	5	5	4
KC10-10	25	2	4	4	2
KC10-10	25	3	3	2	1
KC10-10	25	4	4	4	2
	Totals across reps		16	15	9

## Sheet: Table S2
Table S2. Differences of source least squares means (adjustment for multiple comparisons via Tukey-Kramer) for all pairwise comparisons across all variables measured in years 1, 2, and 3.
Source	Source	Height (year 1)	Diameter (year 1)	Survival (year 1)	Form (year 1)	Whole Tree Dry Mass (year 1)	Height (year 2)	Diameter (year 2)	Survival (year 2)	Form (year 2)	Whole Tree Dry Mass (year 2)	Height (year 3)	Diameter (year 3)	Form (year 3)	Whole Tree Dry Mass (year 3)	Height growth (year 1 to 2)	Diameter growth (year 1 to 2)	Height growth (year 2 to 3)	Diameter growth (year 2 to 3)
PR 2	MRR 14	0.0171	0.0075	1	0.9999	0.1469	1	0.1471	1	1	0.8764	0.9123	1	1	1	0.4395	1	0.1965	0.9998
PR 2	PH 7	0.098	0.9968	0.7361	1	0.9963	<.0001	0.015	0.9984	0.684	0.0093	0.0416	0.5062	0.3133	0.3403	0.0029	0.0296	1	1
PR 2	PH 5	0.0023	0.9886	0.7361	1	0.9591	<.0001	0.3772	1	0.99	0.4742	0.0039	0.9967	0.9999	0.9429	0.005	0.2139	0.9999	1
PR 2	MK 3	1	1	1	0.9999	1	1	1	1	1	1	1	1	1	1	1	1	1	1
PR 2	PH 14	0.9734	0.9493	0.9963	1	0.9692	0.006	0.0585	1	0.9836	0.0686	0.2228	0.8566	0.9998	0.81	0.0391	0.1663	0.9999	1
PR 2	MRR 12	0.9795	0.0397	1	1	0.293	0.9988	0.5488	1	1	0.9634	1	0.9999	1	0.9999	1	1	0.9997	1
PR 2	PH 4	0.0663	0.9093	0.7361	1	0.9595	<.0001	0.0283	0.9984	0.064	0.0502	<.0001	0.2107	0.2278	0.1296	0.0008	0.0927	0.7978	0.9999
PR 2	PH 10	0.002	0.3586	0.943	1	0.1481	<.0001	0.0012	0.9984	0.9431	0.0001	<.0001	0.0091	0.9596	0.0009	0.0004	0.0298	0.9848	0.8846
PR 2	KM 2C	1	1	0.9963	1	1	1	0.9817	1	1	0.9994	1	0.9999	1	0.9999	1	0.7958	1	1
PR 2	NO LABEL	1	1	1	0.9988	1	1	1	1	1	0.9999	1	0.9999	1	1	1	0.9999	0.9989	0.9999
PR 2	PR 9	0.9829	1	1	0.9761	1	0.0358	0.9289	1	0.8825	0.9991	0.3822	0.9953	1	0.9983	0.1735	0.7544	1	1
PR 2	MK 6	1	1	0.943	1	1	0.3039	1	0.9984	1	1	0.6547	1	1	1	0.1031	0.9683	1	1
PR 2	MRR 17	0.3626	0.0014	0.4195	0.9895	0.0819	0.9989	0.0071	0.8231	1	0.5768	1	0.6286	1	0.9492	1	0.967	1	1
PR 2	KR 4	1	0.9999	0.4195	0.0509	0.998	1	1	0.9984	0.9908	1	1	1	1	1	1	1	1	1
PR 2	MRR 19	1	0.2418	1	1	0.4482	0.9996	1	1	0.9999	1	1	1	0.9872	1	0.9831	1	1	1
PR 2	LE	1	1	0.943	1	1	0.2994	0.9868	1	1	0.9985	0.9961	1	1	1	0.1314	0.7451	1	1
PR 2	PH 1	0.9	1	0.4195	1	1	0.0013	0.2958	0.9984	1	0.3391	0.8922	0.9996	0.9994	0.954	0.0307	0.1346	1	1
PR 2	PH 2	0.8497	0.9996	0.943	1	0.9999	0.0086	0.4167	0.9984	1	0.5636	0.0775	0.4757	0.9946	0.3541	0.1891	0.5867	1	0.9976
PR 2	KS	1	1	0.9963	1	1	1	1	0.2632	1	1	0.9865	1	1	1	1	1	0.8565	1
PR 2	KR 5	0.9638	1	0.7361	1	1	0.0084	0.8273	0.9984	0.8743	0.9427	0.0262	0.9931	0.9999	0.9887	0.0576	0.5855	0.8637	1
PR 2	PH 9	0.9776	1	0.9963	1	1	0.2271	0.9999	0.9687	1	0.9999	0.0253	0.9059	0.9994	0.777	0.6738	0.9986	0.4088	0.8848
PR 2	PR 4	0.9995	1	1	1	1	0.0002	0.3381	1	0.7456	0.4665	0.003	0.3954	0.8989	0.3024	0.0002	0.3201	0.9595	0.9681
PR 2	PR 8	1	1	1	1	1	0.8022	1	1	0.9951	1	0.9826	0.9996	1	0.9998	0.2623	0.99	1	1
PR 2	KC10-10	1	0.158	0.9963	0.9998	0.3587	1	0.9938	1	0.9999	0.9994	1	1	1	1	0.9999	1	1	1
MRR 14	PH 7	<.0001	<.0001	0.9963	0.9999	<.0001	<.0001	<.0001	0.9984	0.0489	<.0001	0.997	0.2991	0.2954	0.2013	0.9984	<.0001	0.8238	1
MRR 14	PH 5	<.0001	<.0001	0.9963	0.9868	<.0001	<.0001	<.0001	1	0.4368	0.0003	0.8847	0.9712	0.9999	0.8372	0.9969	0.0028	0.9241	1
MRR 14	MK 3	<.0001	0.0025	1	0.5194	0.1643	0.9997	0.0726	1	1	0.8842	0.9011	1	1	1	0.5584	0.9914	0.4003	0.9187
MRR 14	PH 14	<.0001	<.0001	1	1	<.0001	0.0001	<.0001	1	0.3421	<.0001	1	0.6675	0.9997	0.6376	1	0.0013	0.9226	1
MRR 14	MRR 12	0.975	1	0.9963	1	1	1	1	1	0.9507	1	0.9981	1	1	1	0.6688	1	0.9955	1
MRR 14	PH 4	<.0001	<.0001	0.9963	0.9117	<.0001	<.0001	<.0001	0.9984	0.0006	<.0001	0.1741	0.0936	0.2119	0.0622	0.98	0.0004	0.9999	1
MRR 14	PH 10	<.0001	<.0001	1	0.9999	<.0001	<.0001	<.0001	0.9984	0.1911	<.0001	0.1212	0.0028	0.9537	0.0003	0.9334	<.0001	0.9969	1
MRR 14	KM 2C	0.0003	0.0006	1	1	0.1056	0.986	<.0001	1	1	0.0441	0.998	0.9965	1	0.9986	0.8944	0.0523	0.4399	1
MRR 14	NO LABEL	<.0001	0.0023	1	1	0.0435	0.993	0.0209	1	1	0.1019	1	0.9978	1	0.999	0.9462	0.701	0.9938	1
MRR 14	PR 9	<.0001	0.0003	1	0.1422	0.0995	0.0012	<.0001	1	0.1369	0.0388	1	0.965	1	0.987	1	0.0423	0.9668	1
MRR 14	MK 6	0.0004	0.0231	1	1	0.7105	0.0228	0.0014	0.9984	1	0.2808	1	0.9995	1	0.9999	1	0.1711	0.6686	1
MRR 14	MRR 17	0.9996	1	0.943	1	1	1	1	0.8231	0.8912	1	0.2924	0.8403	1	0.9906	0.948	1	0.7393	0.9912
MRR 14	KR 4	0.0128	0.1365	0.943	0.7485	0.9275	1	0.1905	0.9984	1	0.9936	0.9432	1	1	1	0.7523	0.9807	0.3948	0.9826
MRR 14	MRR 19	0.061	1	1	1	1	0.8476	0.8394	1	0.772	0.9992	0.998	1	0.9851	1	1	0.9997	0.5497	0.9998
MRR 14	LE	0.0003	0.0076	1	1	0.2878	0.0267	0.0001	1	0.9999	0.0368	1	1	1	1	1	0.0459	0.2347	0.9992
MRR 14	PH 1	<.0001	<.0001	0.943	1	0.0032	<.0001	<.0001	0.9984	0.7966	<.0001	1	0.9925	0.9993	0.8602	1	0.0008	0.1393	0.999
MRR 14	PH 2	<.0001	<.0001	1	1	0.0003	0.0003	<.0001	0.9984	1	0.0011	0.9992	0.2806	0.9937	0.2135	1	0.0397	0.8104	1
MRR 14	KS	0.017	0.1023	0.7361	1	0.5849	0.9955	0.7344	0.2632	1	0.9821	1	1	1	1	1	1	1	1
MRR 14	KR 5	<.0001	<.0001	0.9963	0.9814	0.005	0.0002	<.0001	0.9984	0.1209	0.0037	0.9987	0.9468	0.9999	0.9421	1	0.016	0.9991	1
MRR 14	PH 9	<.0001	<.0001	1	0.993	0.0054	0.0142	0.0005	0.9687	0.9836	0.0545	0.9937	0.7401	0.9993	0.5934	1	0.4399	1	1
MRR 14	PR 4	<.0001	<.0001	1	0.9992	0.001	<.0001	<.0001	1	0.0745	0.0002	0.8946	0.2057	0.888	0.1662	0.806	0.0051	0.9943	1
MRR 14	PR 8	0.0059	0.037	1	0.9556	0.4374	0.1931	0.0039	1	0.4537	0.1764	1	0.9929	1	0.9972	1	0.2889	0.2629	1
MRR 14	KC10-10	0.2012	1	1	1	1	1	0.9897	1	0.7584	1	0.9399	1	1	1	0.9904	0.9999	0.5648	0.9999
PH 7	PH 5	1	1	1	1	1	1	1	0.9687	1	1	1	0.9999	0.9643	1	1	1	1	1
PH 7	MK 3	0.6157	0.9932	1	0.9982	0.954	<.0001	0.0085	1	0.3864	0.002	0.0218	0.0839	0.1866	0.0444	0.0029	0.0565	1	0.9512
PH 7	PH 14	0.9952	1	1	1	1	0.9859	1	1	1	1	1	1	0.9907	1	1	1	1	1
PH 7	MRR 12	<.0001	<.0001	0.1716	1	0.0005	<.0001	<.0001	0.541	0.9999	<.0001	0.3019	0.0339	0.9876	0.0194	0.0124	0.0027	1	1
PH 7	PH 4	1	1	1	1	1	1	1	1	1	1	0.9958	1	1	1	1	1	0.9999	1
PH 7	PH 10	0.9999	0.9988	1	1	0.9699	0.9996	1	1	1	1	0.98	0.9993	1	0.9851	1	1	1	1
PH 7	KM 2C	0.2754	0.9993	1	1	0.9701	<.0001	0.8655	1	0.4986	0.4657	0.1456	0.9954	0.3756	0.9645	0.0236	0.9977	1	1
PH 7	NO LABEL	0.6707	0.9978	0.9963	0.9986	0.9995	<.0001	0.1263	0.9984	0.0821	0.4284	0.5086	0.9983	0.0527	0.9847	0.0577	0.6776	1	1
PH 7	PR 9	0.9948	1	1	0.8902	0.9854	0.831	0.959	1	1	0.4982	1	1	0.8337	0.9989	1	0.9989	1	1
PH 7	MK 6	0.1781	0.6832	1	1	0.3002	0.1486	0.21	1	0.0527	0.0449	0.996	0.9556	0.0661	0.8137	1	0.8939	1	1
PH 7	MRR 17	<.0001	<.0001	1	0.9838	<.0001	<.0001	<.0001	1	0.9913	<.0001	0.0005	<.0001	0.0419	<.0001	0.0278	<.0001	1	0.9972
PH 7	KR 4	0.0041	0.1575	1	0.0199	0.0662	<.0001	0.0011	1	0.0017	0.0001	0.0387	0.0546	0.014	0.0352	0.0068	0.0486	1	0.9933
PH 7	MRR 19	0.0042	0.0001	1	1	0.0005	0.0005	<.0001	1	0.9999	<.0001	0.1622	0.0179	0.9997	0.0096	0.5022	0.0233	1	1
PH 7	LE	0.1955	0.8834	1	1	0.7512	0.3029	0.8743	1	0.738	0.6022	0.9612	0.6115	0.3767	0.8839	1	0.9998	1	0.9999
PH 7	PH 1	0.9988	1	1	1	1	0.9978	1	1	0.9994	0.9999	0.9877	0.9991	0.9905	1	1	1	1	0.9998
PH 7	PH 2	0.9999	1	1	1	1	1	1	0.2632	0.9151	1	1	1	0.9999	1	1	1	1	1
PH 7	KS	0.6288	0.9917	0.0125	1	0.9895	0.1366	0.3511	0.0013	0.9097	0.4489	1	0.6262	0.9995	0.6809	0.9083	0.6047	0.999	1
PH 7	KR 5	0.9933	1	1	1	1	0.9315	0.978	1	1	0.8355	1	0.9996	0.8969	0.9973	1	0.9998	1	1
PH 7	PH 9	0.9939	1	1	1	1	0.1639	0.3023	1	0.9326	0.2188	1	1	0.9902	1	0.9188	0.6489	0.9786	1
PH 7	PR 4	0.939	1	0.9963	1	1	1	1	1	1	0.9999	1	1	1	1	1	1	1	1
PH 7	PR 8	0.0529	0.7248	1	1	0.7106	0.0289	0.2032	1	1	0.1546	0.8638	0.9979	0.7645	0.9773	0.9996	0.86	1	1
PH 7	KC10-10	0.0003	<.0001	1	0.9998	0.0002	<.0001	<.0001	1	0.9999	<.0001	0.0365	0.1107	0.1909	0.0462	0.1018	0.0122	1	1
PH 5	MK 3	0.0457	0.9774	1	1	0.7919	<.0001	0.3328	0.9984	0.9389	0.2888	0.0013	0.8126	0.9999	0.4981	0.0059	0.3674	1	0.9942
PH 5	PH 14	0.4684	1	1	1	1	0.9634	1	1	1	1	1	1	1	1	1	1	1	1
PH 5	MRR 12	<.0001	<.0001	0.1716	0.9995	0.0001	<.0001	<.0001	1	1	0.0022	0.0742	0.4469	1	0.219	0.018	0.0359	1	1
PH 5	PH 4	1	1	1	1	1	1	1	0.9687	0.9941	1	1	0.9955	0.9439	0.9997	1	1	1	1
PH 5	PH 10	1	0.9998	1	1	0.9984	1	0.9991	0.9687	1	0.9314	0.9999	0.4724	1	0.3614	1	1	1	0.9997
PH 5	KM 2C	0.0081	0.9961	1	1	0.8346	<.0001	1	1	0.9679	0.9992	0.0161	1	1	1	0.0376	1	1	1
PH 5	NO LABEL	0.0612	0.9911	0.9963	0.9466	0.9871	0.0002	0.8263	1	0.553	0.9979	0.1289	1	0.9763	1	0.0754	0.9664	1	1
PH 5	PR 9	0.4767	0.9996	1	0.9921	0.8944	0.7636	1	1	1	0.9995	0.9988	1	1	1	0.9999	1	1	1
PH 5	MK 6	0.0036	0.5453	1	1	0.1175	0.1446	0.9421	0.9687	0.5113	0.8473	0.8224	1	0.9963	0.9999	1	0.9981	1	1
PH 5	MRR 17	<.0001	<.0001	1	0.7939	<.0001	<.0001	<.0001	0.541	1	<.0001	<.0001	0.0021	0.9845	0.004	0.0478	<.0001	1	0.9999
PH 5	KR 4	<.0001	0.0955	1	0.002	0.0177	<.0001	0.119	0.9687	0.0758	0.0663	0.0029	0.6945	0.8665	0.4249	0.0135	0.3555	1	0.9997
PH 5	MRR 19	<.0001	<.0001	1	0.9916	<.0001	0.0008	0.01	1	1	0.0503	0.0201	0.4276	1	0.1904	0.5255	0.2088	1	1
PH 5	LE	0.0042	0.7853	1	0.9997	0.4579	0.2712	1	1	0.995	0.9998	0.6726	0.9986	1	0.9999	1	1	0.9997	1
PH 5	PH 1	0.548	1	1	0.9984	0.999	0.9907	1	0.9687	1	1	0.7596	1	1	1	1	1	0.9997	1
PH 5	PH 2	0.7348	1	1	0.9998	1	0.9999	1	1	0.9992	1	1	0.9998	1	1	1	1	1	1
PH 5	KS	0.0889	0.9781	0.0125	1	0.9356	0.1109	0.8748	0.541	0.9966	0.9725	0.999	0.9919	1	0.9854	0.8863	0.8835	0.9999	1
PH 5	KR 5	0.4111	0.9998	1	1	0.9986	0.8819	1	0.9687	1	1	1	1	1	1	1	1	1	1
PH 5	PH 9	0.4459	1	1	1	0.9997	0.159	0.9767	0.8231	0.9999	0.9907	1	1	1	1	0.9127	0.9696	0.9965	0.9998
PH 5	PR 4	0.2319	1	0.9963	1	1	1	1	1	1	1	1	0.9998	1	1	1	1	1	1
PH 5	PR 8	0.0007	0.5947	1	1	0.4241	0.0318	0.9263	1	1	0.967	0.3873	1	1	1	0.9991	0.9958	1	1
PH 5	KC10-10	<.0001	<.0001	1	0.9789	<.0001	<.0001	0.0012	1	1	0.0059	0.0028	0.8533	0.9998	0.4848	0.133	0.1442	1	1
MK 3	PH 14	1	0.9141	1	0.9808	0.8333	0.0179	0.0401	1	0.9036	0.023	0.1613	0.3226	0.9994	0.2871	0.049	0.2961	1	0.9909
MK 3	MRR 12	0.3934	0.0196	0.943	0.8313	0.3364	0.9419	0.4016	0.8231	1	0.97	1	1	1	1	1	1	1	1
MK 3	PH 4	0.505	0.8509	1	1	0.7935	<.0001	0.0171	1	0.0138	0.0147	<.0001	0.0122	0.1093	0.0064	0.0007	0.1727	0.9705	0.8764
MK 3	PH 10	0.0409	0.2472	1	0.9985	0.0356	<.0001	0.0005	1	0.7732	<.0001	<.0001	0.0002	0.9191	<.0001	0.0003	0.0569	0.9998	0.2656
MK 3	KM 2C	1	1	1	0.8657	1	1	0.9792	1	1	0.9955	1	0.9456	1	0.9676	1	0.9457	1	1
MK 3	NO LABEL	1	1	1	0.3474	1	1	1	1	1	0.9994	1	0.9657	1	0.9781	1	1	1	0.9378
MK 3	PR 9	1	1	1	1	1	0.0945	0.9173	1	0.6593	0.9937	0.3096	0.8014	1	0.8858	0.226	0.9246	1	0.9917
MK 3	MK 6	1	1	1	0.9899	1	0.5692	1	1	1	1	0.5698	0.9831	1	0.9936	0.1312	0.9981	1	0.9991
MK 3	MRR 17	0.0067	0.0003	0.9963	0.1472	0.0857	0.9051	0.0017	1	0.9999	0.5595	1	0.8449	1	0.995	1	0.5596	1	1
MK 3	KR 4	0.9986	0.9995	0.9963	<.0001	0.9996	1	1	1	0.9969	1	1	1	1	1	1	1	1	1
MK 3	MRR 19	0.9941	0.1443	1	0.5499	0.5058	1	0.9999	1	0.9983	1	1	1	0.972	1	0.9974	1	1	1
MK 3	LE	1	1	1	0.7734	1	0.5581	0.9853	1	1	0.9905	0.9967	1	1	1	0.1746	0.9166	1	1
MK 3	PH 1	1	1	0.9963	0.6592	1	0.004	0.2405	1	0.9991	0.1655	0.8697	0.9181	0.9986	0.5325	0.0363	0.2469	1	1
MK 3	PH 2	0.9998	0.9991	1	0.8084	0.9965	0.0239	0.3827	0.541	1	0.3898	0.0485	0.0828	0.9891	0.0531	0.2605	0.7904	1	0.7782
MK 3	KS	1	1	0.4195	0.9992	1	1	1	0.0066	1	1	0.9886	1	1	1	1	1	0.9723	1
MK 3	KR 5	1	1	1	1	1	0.0245	0.7969	1	0.6337	0.8327	0.0099	0.6908	0.9998	0.6644	0.0715	0.8077	0.9877	0.9974
MK 3	PH 9	1	1	1	1	1	0.464	0.9999	1	1	0.9989	0.0115	0.3821	0.9985	0.2376	0.7973	1	0.7	0.2459
MK 3	PR 4	1	1	1	1	0.9991	0.0005	0.2874	1	0.4715	0.2704	0.0008	0.0386	0.808	0.0264	0.0001	0.5239	0.999	0.3979
MK 3	PR 8	1	1	1	1	1	0.9624	1	1	0.9575	1	0.9802	0.9154	1	0.9489	0.3413	0.9997	1	0.9986
MK 3	KC10-10	0.8814	0.0837	1	0.4539	0.4035	1	0.9787	1	0.998	0.9997	1	1	1	1	1	1	1	1
PH 14	MRR 12	0.0385	<.0001	0.7361	1	0.0002	<.0001	<.0001	0.9687	1	<.0001	0.718	0.1311	1	0.1143	0.1114	0.0234	1	1
PH 14	PH 4	0.9857	1	1	1	1	0.9371	1	1	0.9838	1	0.8199	1	0.9853	1	1	1	1	1
PH 14	PH 10	0.4315	1	1	1	0.9989	0.2263	1	1	1	0.9987	0.6979	0.9563	1	0.715	1	1	1	0.9999
PH 14	KM 2C	0.9998	0.9742	1	1	0.8732	0.1017	0.9781	1	0.9487	0.8681	0.5612	1	1	0.9999	0.2221	1	1	1
PH 14	NO LABEL	1	0.9557	1	1	0.9912	0.1288	0.3182	1	0.458	0.8291	0.9172	1	0.9581	1	0.3489	0.9578	1	1
PH 14	PR 9	1	0.9952	1	0.7225	0.9212	1	0.9967	1	1	0.8872	1	1	1	1	1	1	1	1
PH 14	MK 6	0.9987	0.3706	1	1	0.1585	0.9995	0.4836	1	0.4015	0.2518	1	0.9995	0.9909	0.9967	1	0.9975	1	1
PH 14	MRR 17	<.0001	<.0001	1	0.9993	<.0001	<.0001	<.0001	0.9984	1	<.0001	0.0074	0.0001	0.9701	0.0015	0.2765	<.0001	1	0.9999
PH 14	KR 4	0.6569	0.0505	1	0.0776	0.0285	0.0027	0.0075	1	0.0408	0.0022	0.2358	0.2305	0.8185	0.2359	0.1024	0.2785	1	0.9994
PH 14	MRR 19	0.5731	<.0001	1	1	0.0002	0.3282	0.0003	1	1	0.0017	0.5803	0.0971	1	0.091	0.9397	0.1552	1	1
PH 14	LE	0.9991	0.6082	1	1	0.5276	1	0.9792	1	0.9914	0.9314	0.9997	0.9083	0.9998	0.9974	1	1	0.9997	1
PH 14	PH 1	1	0.9997	1	1	0.9995	1	1	1	1	1	1	1	1	1	1	1	0.9997	1
PH 14	PH 2	1	1	1	1	1	1	1	0.8231	0.9988	1	1	1	1	1	1	1	1	1
PH 14	KS	1	0.9294	0.1716	1	0.9485	0.9319	0.5458	0.028	0.9958	0.7443	1	0.8746	1	0.9396	0.9951	0.8722	0.9999	1
PH 14	KR 5	1	0.997	1	1	0.9992	1	0.9989	1	1	0.992	1	1	1	1	1	1	1	1
PH 14	PH 9	1	0.9994	1	1	0.9998	0.9998	0.6108	1	0.9999	0.65	1	1	1	1	0.9996	0.9601	0.9963	0.9999
PH 14	PR 4	1	1	1	1	1	1	1	1	1	1	1	1	1	1	0.9986	1	1	1
PH 14	PR 8	0.9568	0.4173	1	1	0.4914	0.9542	0.4612	1	1	0.5211	0.9977	1	1	1	1	0.9946	1	1
PH 14	KC10-10	0.2023	<.0001	1	1	<.0001	0.0015	<.0001	1	1	<.0001	0.2315	0.3801	0.9993	0.2777	0.5248	0.099	1	1
MRR 12	PH 4	<.0001	<.0001	0.1716	0.9916	0.0001	<.0001	<.0001	0.541	0.8212	<.0001	0.0019	0.0069	0.9836	0.0041	0.004	0.0107	1	1
MRR 12	PH 10	<.0001	<.0001	0.4195	1	<.0001	<.0001	<.0001	0.541	1	<.0001	0.0013	0.0002	1	<.0001	0.002	0.0028	1	0.9841
MRR 12	KM 2C	0.6389	0.0067	0.7361	1	0.2513	0.7491	0.0026	0.9687	1	0.1375	1	0.6406	1	0.7055	1	0.3156	1	1
MRR 12	NO LABEL	0.4078	0.0174	0.9963	1	0.1233	0.8156	0.1697	1	0.9781	0.247	1	0.6982	0.999	0.7499	1	0.9653	1	1
MRR 12	PR 9	0.0492	0.004	0.943	0.4217	0.235	0.0002	0.001	0.9687	1	0.1246	0.8601	0.4357	1	0.54	0.3478	0.2774	1	1
MRR 12	MK 6	0.706	0.1141	0.4195	1	0.87	0.0037	0.031	0.541	0.9781	0.5328	0.9785	0.7572	1	0.8303	0.2389	0.6156	1	1
MRR 12	MRR 17	1	1	0.0523	1	1	1	1	0.0968	1	1	1	1	0.9997	1	1	1	1	1
MRR 12	KR 4	0.9945	0.3935	0.0523	0.7798	0.979	0.9943	0.6612	0.541	0.5852	0.9993	1	1	0.9892	1	1	0.9999	1	1
MRR 12	MRR 19	0.9997	1	0.943	1	1	0.4168	0.9935	0.9687	1	0.9999	1	1	1	1	0.9982	1	1	1
MRR 12	LE	0.6806	0.05	0.4195	1	0.5103	0.0044	0.0037	0.9984	1	0.1167	1	0.9999	1	0.9828	0.2807	0.2747	0.9993	1
MRR 12	PH 1	0.0126	0.0004	0.0523	1	0.0192	<.0001	<.0001	0.541	1	0.0006	0.9978	0.5867	1	0.2459	0.088	0.0182	0.9993	1
MRR 12	PH 2	0.0099	<.0001	0.4195	1	0.0025	<.0001	0.0001	1	1	0.0053	0.408	0.0323	1	0.0221	0.3416	0.1963	1	0.9999
MRR 12	KS	0.9272	0.2455	1	1	0.7328	0.9053	0.9431	0.9687	1	0.9943	0.9996	1	1	1	1	1	1	1
MRR 12	KR 5	0.0276	0.0013	0.1716	0.9992	0.0262	<.0001	0.0003	0.541	1	0.021	0.2901	0.3453	1	0.3307	0.1529	0.1562	1	1
MRR 12	PH 9	0.0419	0.0013	0.7361	0.9998	0.0265	0.0022	0.0142	0.2632	1	0.1732	0.2432	0.1604	1	0.0967	0.8696	0.8762	1	0.9857
MRR 12	PR 4	0.1627	0.0002	0.9963	1	0.0064	<.0001	<.0001	0.9984	0.9999	0.0017	0.069	0.0185	1	0.0135	0.0008	0.0625	1	0.9983
MRR 12	PR 8	0.9579	0.1505	0.943	0.9965	0.6536	0.0424	0.0578	0.9687	1	0.3817	1	0.5809	1	0.6558	0.4751	0.754	1	1
MRR 12	KC10-10	1	1	0.7361	1	1	0.9997	1	0.9687	1	1	1	1	1	1	1	1	1	1
PH 4	PH 10	1	1	1	1	0.9983	1	1	1	0.9933	0.998	1	0.9999	1	0.9916	1	1	1	1
PH 4	KM 2C	0.1966	0.9437	1	0.9973	0.8348	<.0001	0.9383	1	0.0249	0.8279	<.0001	0.9321	0.2616	0.8085	0.007	1	0.9801	1
PH 4	NO LABEL	0.562	0.9151	0.9963	0.7928	0.9872	<.0001	0.1994	0.9984	0.0014	0.7871	0.0021	0.9695	0.0261	0.9003	0.0206	0.9017	1	1
PH 4	PR 9	0.9848	0.987	1	0.9997	0.8945	0.6535	0.9867	1	0.9996	0.851	0.6219	0.9988	0.7662	0.9831	0.9985	1	1	1
PH 4	MK 6	0.12	0.255	1	1	0.117	0.0687	0.3191	1	0.0005	0.1935	0.073	0.7234	0.0283	0.4815	0.9993	0.9889	0.999	1
PH 4	MRR 17	<.0001	<.0001	1	0.5226	<.0001	<.0001	<.0001	1	0.3508	<.0001	<.0001	<.0001	0.0171	<.0001	0.0077	<.0001	0.9997	0.9881
PH 4	KR 4	0.0022	0.0248	1	0.0004	0.0176	<.0001	0.0025	1	<.0001	0.0011	<.0001	0.0075	0.0053	0.0052	0.0017	0.1596	0.9662	0.9773
PH 4	MRR 19	0.0023	<.0001	1	0.9317	<.0001	0.0001	<.0001	1	0.7438	0.0009	0.0001	0.0018	0.9995	0.001	0.2747	0.0822	0.9931	0.9999
PH 4	LE	0.1339	0.4783	1	0.9903	0.4588	0.1682	0.9428	1	0.0741	0.9083	0.077	0.3085	0.2921	0.6772	0.9999	1	0.8185	0.9995
PH 4	PH 1	0.9951	0.9987	1	0.9726	0.999	0.9816	1	1	0.6008	1	0.0714	0.9772	0.9843	0.9995	1	1	0.7014	0.9992
PH 4	PH 2	0.9994	1	1	0.9936	1	0.9999	1	0.2632	0.2521	1	0.9945	1	0.9998	1	1	1	0.9998	1
PH 4	KS	0.5349	0.8865	0.0125	1	0.9354	0.0811	0.4423	0.0013	0.3629	0.7134	0.8508	0.4024	0.9994	0.4844	0.789	0.8059	1	1
PH 4	KR 5	0.9805	0.9909	1	1	0.9986	0.8057	0.9943	1	0.9988	0.9875	0.9028	0.9812	0.8305	0.9562	0.9999	1	1	1
PH 4	PH 9	0.9824	0.9979	1	1	0.9997	0.0769	0.437	1	0.1691	0.579	0.9955	1	0.9837	1	0.7376	0.8989	1	1
PH 4	PR 4	0.8869	1	0.9963	1	1	1	1	1	1	1	0.9999	1	1	1	1	1	1	1
PH 4	PR 8	0.0329	0.3011	1	1	0.4238	0.0113	0.3068	1	0.9551	0.45	0.011	0.9582	0.6675	0.8553	0.9914	0.9802	0.8986	1
PH 4	KC10-10	0.0002	<.0001	1	0.8789	<.0001	<.0001	<.0001	1	0.7597	<.0001	<.0001	0.0194	0.118	0.0073	0.0367	0.0486	0.9933	1
PH 10	KM 2C	0.0071	0.3812	1	1	0.0405	<.0001	0.3861	1	0.8518	0.0334	<.0001	0.1975	0.9879	0.0271	0.0033	0.9974	0.9999	0.9511
PH 10	NO LABEL	0.0539	0.3423	1	0.999	0.2003	<.0001	0.0161	0.9984	0.2825	0.0326	0.0015	0.3105	0.5962	0.0611	0.0105	0.6732	1	1
PH 10	PR 9	0.4338	0.5792	1	0.8993	0.0639	0.0551	0.5883	1	1	0.0384	0.4862	0.6066	1	0.153	0.9893	0.9986	1	1
PH 10	MK 6	0.0031	0.0189	1	1	0.0004	0.0009	0.0271	1	0.2182	0.0007	0.0506	0.063	0.727	0.0047	0.9933	0.8914	1	0.9869
PH 10	MRR 17	<.0001	<.0001	1	0.9878	<.0001	<.0001	<.0001	1	1	<.0001	<.0001	<.0001	0.6012	<.0001	0.0035	<.0001	1	0.538
PH 10	KR 4	<.0001	0.0007	1	0.026	<.0001	<.0001	<.0001	1	0.0135	<.0001	<.0001	<.0001	0.3221	<.0001	0.0008	0.0508	0.9997	0.4966
PH 10	MRR 19	<.0001	<.0001	1	1	<.0001	<.0001	<.0001	1	1	<.0001	<.0001	<.0001	1	<.0001	0.1707	0.0243	1	0.8573
PH 10	LE	0.0037	0.0564	1	1	0.0059	0.0044	0.4099	1	0.9628	0.0631	0.0516	0.019	0.9697	0.0279	0.9991	0.9998	0.9812	0.8699
PH 10	PH 1	0.5015	0.7442	1	1	0.302	0.3307	0.989	1	1	0.8106	0.0486	0.3203	1	0.329	0.9999	1	0.9702	0.7927
PH 10	PH 2	0.6912	0.9937	1	1	0.8568	0.8662	1	0.2632	0.9934	0.9869	0.9764	0.9999	1	0.9951	1	1	1	1
PH 10	KS	0.0772	0.3837	0.0523	1	0.1743	0.0054	0.1146	0.0013	0.9862	0.0831	0.7573	0.0551	1	0.0299	0.6747	0.6033	1	0.9844
PH 10	KR 5	0.3717	0.5868	1	1	0.2899	0.0961	0.6554	1	1	0.1414	0.7996	0.2816	1	0.0612	0.999	0.9997	1	0.99
PH 10	PH 9	0.405	0.7355	1	1	0.4206	0.001	0.0457	1	0.9982	0.0072	0.9782	0.8709	1	0.6504	0.5727	0.6466	1	1
PH 10	PR 4	0.2067	0.9852	1	1	0.8805	0.91	0.9968	1	1	0.8463	0.9987	0.9965	1	0.9213	1	1	1	1
PH 10	PR 8	0.0006	0.0271	1	1	0.0058	<.0001	0.0279	1	1	0.005	0.0077	0.2444	0.9999	0.0359	0.9626	0.8562	0.9978	0.9939
PH 10	KC10-10	<.0001	<.0001	1	0.9999	<.0001	<.0001	<.0001	1	1	<.0001	<.0001	0.0003	0.9164	<.0001	0.0185	0.0132	1	0.9134
KM 2C	NO LABEL	1	1	1	1	1	1	1	1	1	1	1	1	1	1	1	1	1	1
KM 2C	PR 9	0.9999	1	1	0.4125	1	0.3272	1	1	0.7509	1	0.7684	1	1	1	0.592	1	1	1
KM 2C	MK 6	1	1	1	1	1	0.9004	1	1	1	1	0.9571	1	1	1	0.4358	1	1	1
KM 2C	MRR 17	0.0237	<.0001	1	1	0.0485	0.6241	<.0001	0.9984	1	0.0045	0.9959	0.0057	1	0.0665	1	0.0006	1	1
KM 2C	KR 4	1	0.9922	1	0.2314	0.9982	1	0.8283	1	0.9942	0.8667	1	0.8765	0.9998	0.9397	1	0.949	1	1
KM 2C	MRR 19	0.9999	0.0585	1	1	0.3918	1	0.2469	1	0.9995	0.7976	1	0.6481	0.9978	0.741	1	0.8203	1	1
KM 2C	LE	1	1	1	1	1	0.8873	1	1	1	1	1	1	1	1	0.503	1	1	1
KM 2C	PH 1	0.9957	1	1	1	1	0.0291	1	1	0.9998	0.998	0.9974	1	1	1	0.1748	1	1	1
KM 2C	PH 2	0.9888	1	1	1	0.9984	0.0966	0.9999	0.8231	1	0.9993	0.2457	0.9916	0.9993	0.9625	0.5786	1	1	0.9998
KM 2C	KS	1	1	0.1716	1	1	1	0.9997	0.028	1	1	0.9998	0.999	1	1	1	0.9989	0.9785	1
KM 2C	KR 5	0.9995	1	1	0.9999	1	0.1312	1	1	0.7381	1	0.0993	1	1	1	0.2951	1	0.9924	1
KM 2C	PH 9	0.9998	1	1	1	1	0.8464	1	1	1	1	0.0952	1	1	0.9999	0.984	1	0.7434	0.9515
KM 2C	PR 4	1	1	1	1	0.9996	0.0045	1	1	0.5772	0.9995	0.0119	0.9907	0.9555	0.964	0.0014	1	0.9995	0.9927
KM 2C	PR 8	1	1	1	0.9992	1	0.9991	1	1	0.979	1	1	1	1	1	0.7375	1	1	1
KM 2C	KC10-10	0.9819	0.0293	1	1	0.293	1	0.0544	1	0.9994	0.3228	1	0.962	1	0.9609	1	0.7337	1	1
NO LABEL	PR 9	1	1	1	0.0756	1	0.3809	0.9994	1	0.2057	1	0.9795	1	0.9995	1	0.734	1	1	1
NO LABEL	MK 6	1	1	1	0.9999	0.9995	0.9198	1	0.9984	1	1	0.9996	1	1	1	0.5983	1	1	1
NO LABEL	MRR 17	0.0084	0.0003	0.943	1	0.0179	0.732	0.0004	0.8231	0.9503	0.0166	0.954	0.0134	1	0.1079	1	0.1078	1	0.9944
NO LABEL	KR 4	0.9987	0.999	0.943	0.8863	0.9695	1	1	0.9984	1	0.9551	1	0.9151	1	0.9575	1	1	1	0.9881
NO LABEL	MRR 19	0.9944	0.13	1	1	0.1986	1	0.9854	1	0.8652	0.9158	1	0.73	0.7435	0.7994	1	1	1	0.9999
NO LABEL	LE	1	1	1	1	1	0.9053	1	1	1	1	1	1	1	1	0.643	1	0.9979	0.9995
NO LABEL	PH 1	1	1	0.943	1	1	0.0432	0.7798	0.9984	0.8857	0.9954	1	1	0.9279	1	0.3016	0.9491	0.9975	0.9994
NO LABEL	PH 2	0.9999	0.9998	1	1	1	0.116	0.8284	0.9984	1	0.9982	0.6461	0.9965	0.841	0.9831	0.6817	0.9987	1	1
NO LABEL	KS	1	1	0.7361	1	1	1	1	0.2632	1	1	1	0.9992	0.9999	1	1	1	1	1
NO LABEL	KR 5	1	1	0.9963	0.9319	1	0.1679	0.9956	0.9984	0.1862	1	0.4746	1	0.9595	1	0.4477	0.9999	1	1
NO LABEL	PH 9	1	1	1	0.9677	1	0.8736	1	0.9687	0.9953	1	0.4137	1	0.9299	1	0.9942	1	1	1
NO LABEL	PR 4	1	1	1	0.9941	1	0.0074	0.8058	1	0.1187	0.9985	0.1153	0.9968	0.4152	0.9866	0.0046	0.9932	1	1
NO LABEL	PR 8	1	1	1	0.8779	1	0.9993	1	1	0.5805	1	1	1	0.9987	1	0.8471	1	1	1
NO LABEL	KC10-10	0.8883	0.0747	1	1	0.1385	1	0.8108	1	0.855	0.5154	1	0.9758	1	0.9728	1	0.9999	1	1
PR 9	MK 6	0.9993	1	1	0.7726	1	1	1	1	0.1562	1	1	1	1	1	1	1	1	1
PR 9	MRR 17	<.0001	<.0001	0.9963	0.0192	0.0465	<.0001	<.0001	0.9984	0.9996	0.0038	0.0215	0.0027	0.9999	0.0396	0.6949	0.0005	1	0.9998
PR 9	KR 4	0.7166	0.9732	0.9963	<.0001	0.997	0.0184	0.6477	1	0.0089	0.8449	0.4116	0.6837	0.9904	0.8307	0.3792	0.9282	1	0.9993
PR 9	MRR 19	0.6385	0.0369	1	0.1569	0.3714	0.7018	0.1308	1	1	0.7715	0.7812	0.4245	1	0.5685	0.9987	0.7786	1	1
PR 9	LE	0.9995	1	1	0.3013	1	1	1	1	0.9135	1	1	0.9978	1	1	1	1	0.9998	1
PR 9	PH 1	1	1	0.9963	0.1991	1	1	1	1	1	0.9987	1	1	1	1	1	1	0.9999	1
PR 9	PH 2	1	1	1	0.3341	0.9994	1	1	0.8231	0.9793	0.9995	1	1	1	0.9985	1	1	1	1
PR 9	KS	1	1	0.4195	0.9582	1	0.9911	0.998	0.028	0.968	1	1	0.9893	1	0.9995	0.9999	0.9982	1	1
PR 9	KR 5	1	1	1	0.9946	1	1	1	1	1	1	1	1	1	1	1	1	1	1
PR 9	PH 9	1	1	1	0.9926	1	1	1	1	0.991	1	1	1	1	1	1	1	0.9992	1
PR 9	PR 4	1	1	1	0.9808	0.9999	0.9995	1	1	1	0.9997	0.9993	1	0.9998	0.9993	0.9385	1	1	1
PR 9	PR 8	0.97	1	1	0.9997	1	0.9987	1	1	1	1	0.9999	1	1	1	1	1	1	1
PR 9	KC10-10	0.2471	0.0178	1	0.1095	0.2764	0.0103	0.0232	1	1	0.2967	0.4049	0.8416	1	0.8705	0.8863	0.6841	1	1
MK 6	MRR 17	0.0308	0.0042	1	0.9971	0.568	0.0003	<.0001	1	0.9397	0.0589	0.0492	0.0083	1	0.1063	0.5278	0.0036	1	1
MK 6	KR 4	1	1	1	0.0427	1	0.2193	0.9989	1	1	0.9992	0.693	0.9468	1	0.9839	0.2398	0.9985	1	1
MK 6	MRR 19	1	0.536	1	1	0.9725	0.9954	0.7917	1	0.845	0.9966	0.9612	0.7741	0.8609	0.8688	0.9943	0.9791	1	1
MK 6	LE	1	1	1	1	1	1	1	1	1	1	1	1	1	1	1	1	1	1
MK 6	PH 1	0.9849	0.9956	1	1	0.9551	0.9899	0.9187	1	0.8636	0.7354	1	1	0.9798	1	1	0.9968	1	1
MK 6	PH 2	0.9681	0.8406	1	1	0.5983	0.993	0.9393	0.2632	1	0.8876	0.9991	0.9389	0.9323	0.8201	1	1	1	1
MK 6	KS	1	1	0.0523	1	1	1	1	0.0013	1	1	1	0.9998	1	1	0.9997	1	0.9967	1
MK 6	KR 5	0.9976	0.9997	1	1	0.9722	0.9999	0.9999	1	0.1364	0.9994	0.9979	1	0.9919	1	1	1	0.9998	1
MK 6	PH 9	0.999	0.9992	1	1	0.9642	1	1	1	0.9951	1	0.9907	0.9999	0.9803	0.9954	1	1	0.922	0.9876
MK 6	PR 4	1	0.9602	1	1	0.746	0.7921	0.9318	1	0.0845	0.8465	0.8215	0.9159	0.5245	0.787	0.9537	0.9999	1	0.9992
MK 6	PR 8	1	1	1	1	1	1	1	1	0.5228	1	1	1	1	1	1	1	1	1
MK 6	KC10-10	0.9914	0.3842	1	1	0.9435	0.1379	0.3659	1	0.8311	0.845	0.682	0.9894	1	0.9913	0.7826	0.9549	1	1
MRR 17	KR 4	0.3817	0.0376	1	0.9044	0.8581	0.9919	0.0075	1	0.3351	0.9096	1	0.9602	1	0.9994	1	0.4326	1	1
MRR 17	MRR 19	0.716	0.9994	0.9963	1	1	0.251	0.2309	0.9984	1	0.9788	0.9981	0.997	0.7573	1	1	0.8414	1	1
MRR 17	LE	0.0266	0.001	1	1	0.1656	0.0005	<.0001	0.9687	1	0.0038	0.7343	0.7043	1	0.6181	0.6025	0.0007	0.9999	1
MRR 17	PH 1	<.0001	<.0001	1	1	0.0007	<.0001	<.0001	1	1	<.0001	0.2144	0.0052	0.9471	0.0047	0.2209	<.0001	0.9999	1
MRR 17	PH 2	<.0001	<.0001	1	1	<.0001	<.0001	<.0001	0.028	1	<.0001	0.0016	<.0001	0.8683	0.0001	0.6799	0.0012	1	0.9534
MRR 17	KS	0.2942	0.0428	0.0024	1	0.4879	0.9036	0.3178	<.0001	1	0.9245	0.7563	0.9995	1	0.9999	1	0.9868	0.9984	1
MRR 17	KR 5	<.0001	<.0001	1	0.7588	0.0012	<.0001	<.0001	1	0.9996	0.0001	<.0001	0.0004	0.9706	0.0049	0.365	<.0001	1	1
MRR 17	PH 9	<.0001	<.0001	1	0.859	0.0014	0.0001	<.0001	1	1	0.005	0.0002	0.0002	0.945	0.0008	0.9958	0.0246	0.9539	0.52
MRR 17	PR 4	0.0011	<.0001	0.943	0.9594	0.0002	<.0001	<.0001	0.9687	0.9946	<.0001	<.0001	<.0001	0.3995	<.0001	0.0015	<.0001	1	0.7198
MRR 17	PR 8	0.2144	0.0082	0.9963	0.6691	0.2973	0.0098	<.0001	0.9984	1	0.0317	0.441	0.0039	0.9996	0.0511	0.8286	0.0114	1	1
MRR 17	KC10-10	0.9536	0.9999	1	1	1	0.9997	0.646	0.9984	1	1	1	0.8699	1	0.9984	1	0.8713	1	1
KR 4	MRR 19	1	0.9222	0.9963	0.6419	0.999	0.9996	1	1	0.2294	1	1	1	0.4622	1	0.9999	1	1	1
KR 4	LE	1	1	1	0.2777	1	0.2309	0.8636	1	0.9713	0.8224	0.9988	1	1	0.9999	0.3086	0.9184	1	1
KR 4	PH 1	0.3832	0.7574	1	0.2874	0.6639	0.0004	0.0646	1	0.2337	0.0238	0.9251	0.8345	0.7453	0.4596	0.0741	0.2354	1	1
KR 4	PH 2	0.3209	0.2899	1	0.2438	0.2115	0.0048	0.1588	0.2632	0.9938	0.1179	0.0776	0.0542	0.6123	0.0425	0.4087	0.7954	1	0.9282
KR 4	KS	1	1	0.0024	0.376	1	1	1	0.0013	1	1	0.9936	1	0.9984	1	1	1	0.9674	1
KR 4	KR 5	0.5793	0.9095	1	0.0016	0.7346	0.0034	0.4459	1	0.0065	0.3839	0.0211	0.5526	0.7958	0.585	0.1425	0.8058	0.9851	0.9999
KR 4	PH 9	0.676	0.8866	1	0.0043	0.7158	0.1576	0.9915	1	0.6384	0.9227	0.0224	0.2771	0.7445	0.1936	0.9309	1	0.6927	0.4801
KR 4	PR 4	0.9504	0.5573	0.943	0.0172	0.352	<.0001	0.0907	1	0.004	0.0548	0.002	0.0242	0.1764	0.0211	0.0003	0.5164	0.9986	0.6749
KR 4	PR 8	1	1	0.9963	0.0015	1	0.7483	0.9998	1	0.0677	0.992	0.992	0.8286	0.9789	0.9121	0.5293	0.9998	1	1
KR 4	KC10-10	1	0.8338	1	0.74	0.9967	1	0.9991	1	0.2169	1	1	1	1	1	1	1	1	1
MRR 19	LE	1	0.3067	1	1	0.709	0.9926	0.2907	1	1	0.744	1	1	0.991	0.996	0.9945	0.7683	1	1
MRR 19	PH 1	0.3311	0.0041	0.9963	1	0.0268	0.14	0.0036	1	1	0.0187	0.9975	0.5922	1	0.2122	0.925	0.1231	1	1
MRR 19	PH 2	0.2747	0.0004	1	1	0.003	0.2833	0.0182	0.8231	1	0.0916	0.2661	0.0185	1	0.0123	0.9917	0.6139	1	0.9974
MRR 19	KS	1	0.7259	0.4195	1	0.8944	1	1	0.028	1	1	0.9998	1	1	1	1	1	0.9883	1
MRR 19	KR 5	0.5054	0.0125	1	0.9878	0.038	0.4102	0.0585	1	1	0.3117	0.1185	0.2821	1	0.2836	0.9761	0.5973	0.9979	1
MRR 19	PH 9	0.5948	0.0123	1	0.9958	0.0387	0.989	0.6216	1	1	0.8665	0.1087	0.1187	1	0.0693	1	0.9995	0.8405	0.8555
MRR 19	PR 4	0.908	0.0025	1	0.9996	0.0088	0.0273	0.0063	1	0.9999	0.042	0.0155	0.0065	1	0.0049	0.0882	0.3216	0.9999	0.9578
MRR 19	PR 8	1	0.6181	1	0.9682	0.8434	1	0.8898	1	1	0.9789	1	0.577	1	0.6841	0.9998	0.9947	1	1
MRR 19	KC10-10	1	1	1	1	1	0.9958	1	1	1	1	1	1	0.9698	1	1	1	1	1
LE	PH 1	0.9888	0.9999	1	1	0.9997	0.9985	1	1	1	0.9996	1	0.9998	0.9996	1	1	1	1	1
LE	PH 2	0.9749	0.9612	1	1	0.9446	0.9985	0.9999	0.9687	1	0.9998	0.9832	0.576	0.9961	0.8799	1	1	1	0.9948
LE	KS	1	1	0.0523	1	1	1	0.9998	0.0968	1	1	1	1	1	1	0.9996	0.9972	0.8396	1
LE	KR 5	0.9984	1	1	0.9994	0.9999	1	1	1	0.9089	1	0.9722	0.9972	1	1	1	1	0.8763	1
LE	PH 9	0.9993	1	1	0.9999	0.9998	1	1	0.9984	1	1	0.9375	0.9444	0.9996	0.9967	1	1	0.4649	0.8728
LE	PR 4	1	0.9949	1	1	0.9782	0.9129	1	1	0.7936	0.9999	0.6801	0.5148	0.9249	0.8857	0.9886	1	0.9583	0.9586
LE	PR 8	1	1	1	0.9968	1	1	1	1	0.9978	1	1	0.9999	1	1	1	1	1	1
LE	KC10-10	0.9885	0.1948	1	1	0.6034	0.1486	0.0714	1	1	0.281	0.9986	1	1	1	0.8186	0.6721	1	1
PH 1	PH 2	1	1	1	1	1	1	1	0.2632	1	1	0.9962	0.998	1	1	1	1	1	0.9921
PH 1	KS	0.9995	1	0.0024	1	1	0.8284	0.8678	0.0013	1	0.9621	1	0.9977	1	0.9891	0.9941	0.8651	0.8126	1
PH 1	KR 5	1	1	1	0.9973	1	1	1	1	1	1	0.9923	1	1	1	1	1	0.7823	1
PH 1	PH 9	1	1	1	0.9994	1	0.994	0.9676	1	1	0.9781	0.976	1	1	1	0.9995	0.9489	0.3066	0.7896
PH 1	PR 4	1	1	0.943	1	1	1	1	1	0.9996	1	0.7588	0.9982	1	1	0.9976	1	0.9242	0.9213
PH 1	PR 8	0.8397	0.9966	0.9963	0.9899	0.9992	0.8094	0.9005	1	1	0.9336	1	1	1	1	1	0.9932	1	1
PH 1	KC10-10	0.0753	0.0015	1	1	0.0145	0.0002	0.0003	1	1	0.0013	0.9196	0.9401	0.9981	0.5234	0.4607	0.0788	1	1
PH 2	KS	0.9983	0.9982	0.0523	1	0.9993	0.8376	0.8564	0.9984	1	0.9728	1	0.588	1	0.6715	0.9987	0.9774	0.9984	0.9998
PH 2	KR 5	1	1	1	0.9997	1	1	1	0.2632	0.9798	1	1	0.999	1	0.9967	1	1	1	1
PH 2	PH 9	1	1	1	0.9999	1	0.9957	0.9737	0.0968	1	0.9932	1	1	1	1	1	0.9992	0.9738	1
PH 2	PR 4	1	1	1	1	1	1	1	0.9687	0.9329	1	1	1	1	1	0.9999	1	1	1
PH 2	PR 8	0.7757	0.8657	1	0.998	0.9221	0.8811	0.9232	0.8231	0.9997	0.9753	0.9343	0.9958	1	0.9756	1	1	1	1
PH 2	KC10-10	0.0603	0.0001	1	1	0.0014	0.0026	0.0028	0.8231	1	0.0146	0.0742	0.1073	0.987	0.0543	0.839	0.5245	1	0.999
KS	KR 5	0.9999	1	0.0125	1	1	0.9611	0.9934	0.0013	0.9699	0.9999	1	0.9886	1	0.9979	0.9985	0.9933	1	1
KS	PH 9	1	1	0.1716	1	1	1	1	0.0002	1	1	1	0.9142	1	0.9341	1	1	1	0.9863
KS	PR 4	1	0.9998	0.7361	1	0.9998	0.5212	0.8721	0.0968	0.9215	0.9772	0.9994	0.5732	1	0.6855	0.5194	0.9494	1	0.9978
KS	PR 8	1	1	0.4195	1	1	1	1	0.028	0.9985	1	1	0.998	1	0.9999	1	1	0.9329	1
KS	KC10-10	0.9997	0.6141	0.1716	1	0.8442	1	1	0.028	1	0.9999	0.9927	1	1	1	1	1	0.9874	1
KR 5	PH 9	1	1	1	1	1	1	1	1	0.9906	1	1	1	1	1	1	1	1	0.9906
KR 5	PR 4	1	1	0.9963	1	1	1	1	1	1	1	1	0.999	1	0.9978	0.986	1	1	0.9995
KR 5	PR 8	0.9377	0.9997	1	1	0.9996	0.9801	0.9997	1	1	1	0.8638	1	1	1	1	1	0.9437	1
KR 5	KC10-10	0.1527	0.0052	1	0.971	0.0214	0.0019	0.008	1	1	0.0548	0.0203	0.7548	0.9996	0.6518	0.6372	0.4794	0.9979	1
PH 9	PR 4	1	1	1	1	1	0.8241	0.9725	0.9984	0.9542	0.9922	1	1	1	1	0.3704	0.9949	1	1
PH 9	PR 8	0.9622	0.9994	1	1	0.9993	1	1	1	1	1	0.7954	1	1	1	1	1	0.5177	0.9945
PH 9	KC10-10	0.2141	0.0054	1	0.9886	0.0226	0.097	0.2189	1	1	0.3912	0.0216	0.4461	0.9982	0.2328	0.9997	0.9981	0.8511	0.9138
PR 4	PR 8	0.999	0.9669	1	1	0.9658	0.3836	0.9145	1	1	0.9698	0.3662	0.9957	0.9995	0.9782	0.8624	0.9997	0.991	0.9998
PR 4	KC10-10	0.574	0.001	1	0.9986	0.0047	<.0001	0.0006	1	1	0.0042	0.0019	0.0565	0.8082	0.0279	0.0083	0.2333	0.9999	0.9804
PR 8	KC10-10	1	0.4695	1	0.9368	0.762	0.5962	0.5158	1	1	0.6985	0.9911	0.9389	1	0.9401	0.9527	0.9864	1	1
